# Supplementary material for: A systematic genome-wide mapping of oncogenic mutation selection during CRISPR-Cas9 genome editing
Source: Nat Commun. 2021 Nov 11;12:6512. doi: 10.1038/s41467-021-26788-6 (PMC8586238; doi:10.1038/s41467-021-26788-6)
Supplement: Supplementary file 7 — Supplementary Data 3 [file 41467_2021_26788_MOESM7_ESM.xlsx]

## Sheet: S3.cfs.enrichment
Table S3. Chromosomal common fragile sites (CFSs) enrichment analysis
Chromosomal common fragile sites enrichment analysis with hypergeometric tests, for the CDE+/- genes as well as for the shRNA-DE+/- genes, i.e. those genes showing differential essentiality in shRNA screens. We note that the significance in the CDE+ case for p53 is not observed in the respective shRNA-DE+ case. Also as expected the CDE- genes do not show any significant enrichment in CFSs.
CDE genes	overlap gene count	odds ratio	p value	fdr		shRNA-DE genes	overlap gene count	odds ratio	p value
TP53-CDE+	84	1.56563	0.000226832	0.0006804		TP53-shRNA-DE+	108	1.06649	0.286687
KRAS-CDE+	41	0.917141	0.722875	0.7229		KRAS-shRNA-DE+	0	0	1
CDE genes	overlap gene count	odds ratio	p value
TP53-CDE-	6	0.467156	0.986176
KRAS-CDE-	56	0.964629	0.620611
